# Supplementary material for: Differential regulation of SIRT5 activity by reduced nicotinic acid riboside (NARH)
Source: Royal Society of Chemistry journal article supplement (doi:10.1039/d5cb00191a), 2025-12-02

## **Raw Data Files for Gels and Blots**

### **Differential Regulation of SIRT5 Activity by Reduced Nicotinic Acid Riboside (NARH)**

Abu Hamza<sup>‡</sup>, Dickson Donu<sup>‡</sup>, Emily Boyle<sup>‡</sup>, Rasajna Madhusudhana<sup>‡</sup>, Alyson Curry<sup>‡</sup>, Yana  
Cen<sup>‡, #, \*</sup>

<sup>‡</sup>*Department of Medicinal Chemistry, Virginia Commonwealth University, Richmond, VA 23219*

<sup>#</sup>*Center for Drug Discovery, Virginia Commonwealth University, Richmond, VA 23219*

\*Correspondence: [ceny2@vcu.edu](mailto:ceny2@vcu.edu), phone: 804-828-7405

**Figure 1.** Activation of SIRT5 by NARH on physiological substrates.

**A**

**CPS1Suc**

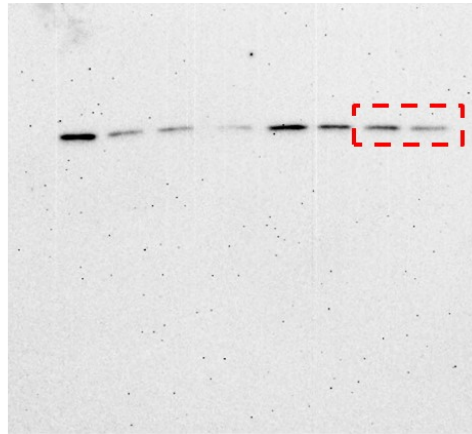

**CPS1**

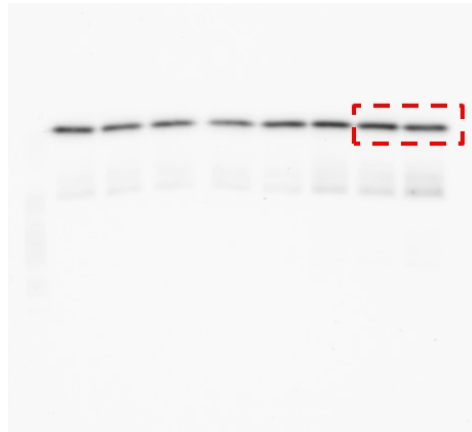

**B**

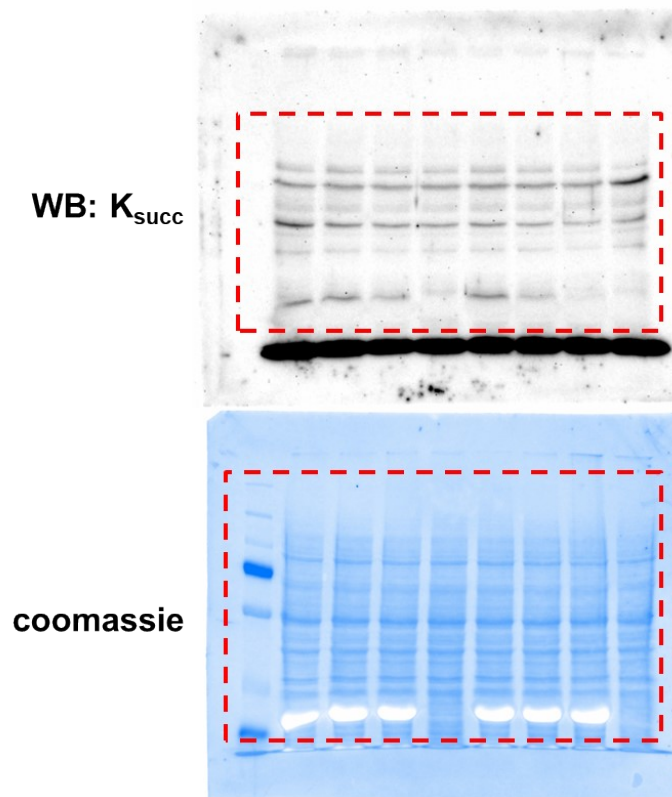

**Figure 5.** Target engagement of NARH assessed by CETSA.

**A**

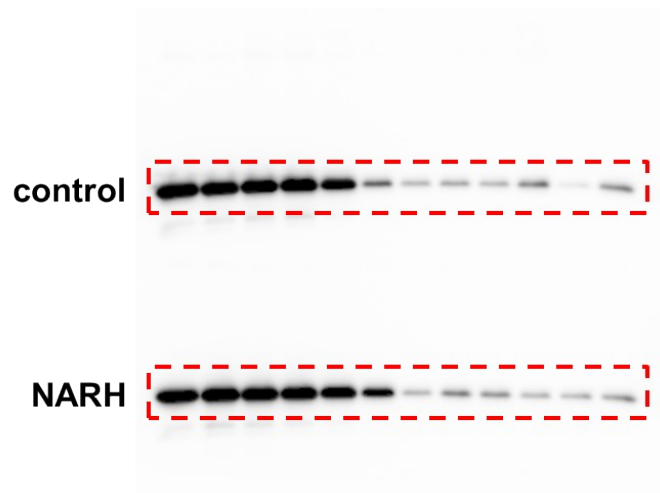

**C**

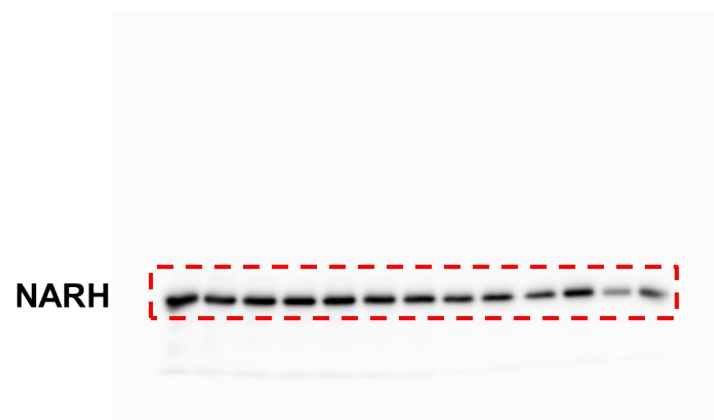

**Figure 6.** Activation of SIRT5 by NARH in cells.

**C**

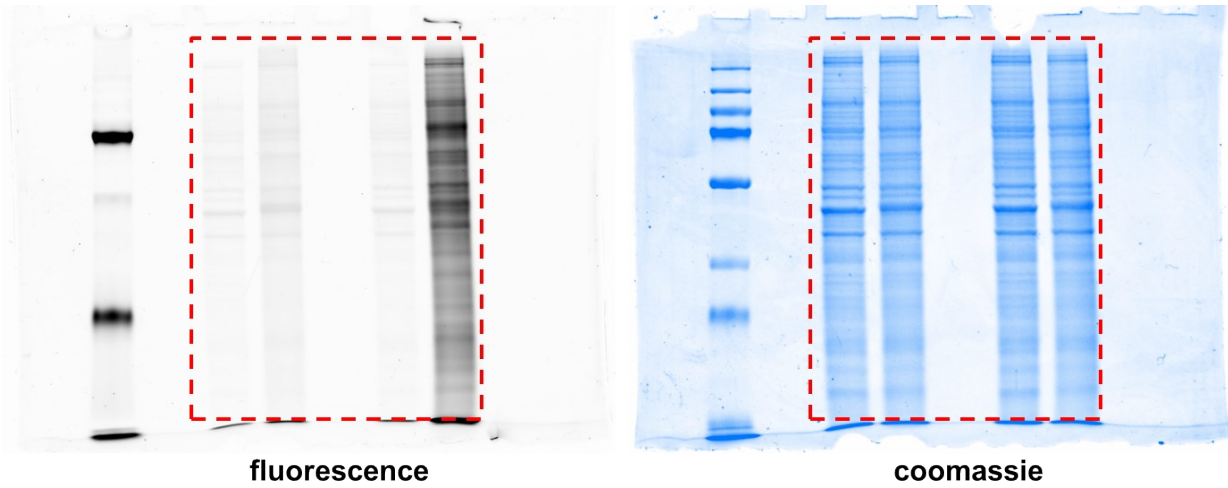

Supplement: d5cb00191a2.pdf [file d5cb00191a2.pdf]
